# Supplementary material for: Direct and Indirect Competitive Interactions between Ooencyrtus nezarae and Paratelenomus saccharalis Parasitizing Megacopta cribraria Egg Patches
Source: MDPI journal article supplement (doi:10.3390/insects14010035), 2022-12-30
Supplement: s1 [file s1]

**Direct and indirect competitive interactions between *Ooencyrtus nezarae* and *Paratelenomus saccharalis* parasitizing *Megacopta cribraria* egg patches****Supplement file**Table S1. The proportion of unscribed eggs (unhatched or unparasitized) averaged across treatments in experiments conducted to examine how the order of *Ooencyrtus nezarae* and/or *Paratelenomus saccharalis* adult arrival at a *Megacopta cribraria* egg patch influences competition.

| (Proportion ± SE)                         |                                            |
|-------------------------------------------|--------------------------------------------|
| Treatment                                 | <i>M. cribraria</i> unscribed eggs         |
| <i>O. nezarae</i> + <i>P. saccharalis</i> | 0.20 ± 0.024 <sup>b</sup>                  |
| <i>O. nezarae</i> → <i>P. saccharalis</i> | 0.40 ± 0.025 <sup>a</sup>                  |
| <i>P. saccharalis</i> → <i>O. nezarae</i> | 0.36 ± 0.025 <sup>a</sup>                  |
| ANOVA for the main effect                 | F = 19.86; df = 2, 237; <i>p</i> = <0.0001 |

LS-means within a column followed by the same letter are not significantly different at *P* < 0.05. Data were presented with one-way ANOVA using simulated multiple comparison test.

Table S2. The proportion of unscribed eggs (unhatched or unparasitized) averaged across treatments in experiments conducted to examine how the order of *Ooencyrtus nezarae* and/or *Paratelenomus saccharalis* adult arrival at a *Megacopta cribraria* egg patch influences competition.

| (Proportion ± SE)         |                                            |                                           |                                           |
|---------------------------|--------------------------------------------|-------------------------------------------|-------------------------------------------|
| Time interval             | <i>O. nezarae</i> + <i>P. saccharalis</i>  | <i>O. nezarae</i> → <i>P. saccharalis</i> | <i>P. saccharalis</i> → <i>O. nezarae</i> |
| 12-h                      | 0.13 ± 0.04 <sup>d</sup>                   | 0.27 ± 0.04 <sup>cd</sup>                 | 0.33 ± 0.04 <sup>bcd</sup>                |
| 24-h                      | 0.16 ± 0.04 <sup>d</sup>                   | 0.21 ± 0.04 <sup>cd</sup>                 | 0.27 ± 0.04 <sup>cd</sup>                 |
| 48-h                      | 0.20 ± 0.04 <sup>cd</sup>                  | 0.64 ± 0.04 <sup>a</sup>                  | 0.47 ± 0.04 <sup>ab</sup>                 |
| 72-h                      | 0.29 ± 0.04 <sup>bcd</sup>                 | 0.47 ± 0.04 <sup>ab</sup>                 | 0.38 ± 0.04 <sup>bc</sup>                 |
| ANOVA table               |                                            |                                           |                                           |
| Treatment                 | F = 26.40; df = 2, 228; <i>p</i> = <0.0001 |                                           |                                           |
| time interval             | F = 19.57; df = 3, 228; <i>p</i> = <0.0001 |                                           |                                           |
| Treatment x time interval | F = 4.74; df = 6, 228; <i>p</i> = 0.0001   |                                           |                                           |

LS-means within a column followed by the same letter are not significantly different at *P* < 0.05. Data were presented with two-way ANOVA using a simulated multiple comparison test.
